# Supplementary material for: 2D TaSe2 as a zero-strain and high-performance anode material for Li+ storage
Source: Royal Society of Chemistry journal article supplement (doi:10.1039/d3mh00072a), 2023-01-01
Supplement: d3mh00072a1.pdf [file d3mh00072a1.pdf]

## Supporting Information

# 2D TaSe<sub>2</sub> as a Zero-Strain and High-Performance Anode Material for Li<sup>+</sup> Storage

Fei Wang, Jian Mao\*.

\*Corresponding author: Prof. Jian Mao, E-mail: [maojian@scu.edu.cn](mailto:maojian@scu.edu.cn).

College of Materials Science and Engineering, Sichuan University, Chengdu 610065,  
China.

## Methods

### Exfoliation of 2D TaSe<sub>2</sub>

0.1 g Bulk TaSe<sub>2</sub> powder was added to 10 mL ethanol, and the mixture was sonicated for 15 h. The upper suspension was centrifuged and dried (70 °C, 10 h) in the vacuum condition to obtain the 2D TaSe<sub>2</sub>.

### Characterizations

The morphology and structures were tested by SEM (JSM-7500F), TEM (JEM-2100F) and AC-STEM (Titan Themis Z). The XRD patterns and XPS spectra were collected by powder diffractometer (EMPYREAN) and X-ray photoelectron spectrometer (XSAM800). The *in-situ* XRD data were obtained using a Bruker D2 powder diffractometer. The specific surface area was tested by a specific surface and porosity analyzer (ASAP2460). The thickness of 2D TaSe<sub>2</sub> was tested on AFM (Bruker Dimension Icon). The conductivity of electrodes with diameters of 14.2 mm and

scraped slurry thickness of 50  $\mu\text{m}$  was tested by BM901 multimeter. For the testing of conductivity, 20 parallel tests were conducted and the average value is calculated.

The active materials (2D and bulk  $\text{TaSe}_2$ ) were mixed with polyvinylidene fluoride in N-methyl-2-pyrrolidinone solvent (mass ratio of 95:5 wt%) without adding conductive additive due to the excellent conductivity of  $\text{TaSe}_2$ . The slurry was scraped onto the copper foil to prepare the electrodes. 2032 Coin-type cells were assembled in an argon glove box. The loading mass of active material is around 3 mg (half cells) except for special instructions. At least five cells were used to confirm reproducibility.

The rate and cycling performance were tested using a LAND tester by the galvanostatic method. The EIS and CV were performed by a CHI660E electrochemical workstation. The frequency of 100 kHz to 10 Hz and AC perturbation of 5 mV were set in EIS tests. For the GITT measurement, the current pulse of 0.2 A  $\text{g}^{-1}$  was applied for 270 s while the following relaxation time is 1080 s. The electrochemical properties are tested at room temperature. For the *in-situ* XRD tests, the current density is as low as 0.05A/g and the scanning rate is 5 degree/min.

### **DFT Simulations**

The spin-polarized DFT calculations were conducted with the Cambridge sequential total energy package (CASTEP) using the Perdew–Burke–Ernzerhof (PBE) generalized gradient approximation (GGA) functional. The convergence criteria (energy cutoff of 500 eV, total energy tolerance of  $2 \times 10^{-5}$  eV and force difference of 0.05 eV/Å) were set. The van der Waals (vdW) force was corrected by the TS's method. For calculating band structures,  $12 \times 12 \times 5$  grid k-points were used, if not  $5 \times 5 \times 2$  grid k-points were used.

The linear synchronous transition/quadratic synchronous transit (LST/QST) tools were employed to calculate the diffusion energy barrier.

### **Determination of Li<sup>+</sup> diffusion energy barrier using the LST/QST tools in the CASTEP code**

The simplest way to calculate a reaction/diffusion path is to start at a saddle point and take successive steps in the direction of the negative gradient. This steepest descent approach leads to a minimum energy path (MEP). If the coordinate system is mass-weighted, this is called an intrinsic reaction coordinate (IRC). The DMol<sup>3</sup> uses the nudged elastic band (NEB) method for minimum energy path calculations. The NEB method introduces a fictitious spring force that connects neighbouring points on the path to ensure continuity of the path and projection of the force so that the system converges to the MEP. The NEB method has been used widely in the study of solid-state physics and molecules. The advantage of the NEB algorithm is that it provides a fast qualitative examination of the MEP. The LST/QST tools are widely used to explore the energy barrier for the diffusion of ions/atoms. [1, 2]

### **Used separator and electrolyte**

Celgard 2500 (polypropylene) was used as the separator. For the electrolyte, 1M LiPF<sub>6</sub> was dissolved into the mixture of ethylene carbonate (EC), dimethyl carbonate (DMC) and ethyl methyl carbonate (EMC) with the volume ratio of 1:1:1.

### **Calculation of charge density difference**

The charge density difference ( $\Delta\rho$ ) is calculated from the following expression.

$$\Delta\rho = \rho_t - \sum\rho_i \quad (\text{S1})$$

where the  $\rho_i$  is the electron density of the total system and the  $\sum \rho_i$  is the electron density summation of all atoms.

### Calculation of volume expansion

Because lattice parameters of a and b are not change, the volume expansion ( $\Delta V$ ) is calculated by the following Equation.

$$\Delta V = \Delta c \quad (S2)$$

Where the  $\Delta c$  are the change of lattice parameters along c axis, which can be calculated by Bragg equation based on the XRD patterns.

### Calculation of lithiated chemical formula by specific capacity

The number of  $\text{Li}^+$  (n) at full lithiation can be calculated by the following equation.

$$n = \frac{3.6MC}{F} \quad (S3)$$

where the M, C and F are the molecular weight of  $\text{TaSe}_2$ , the specific capacity of bulk/2D  $\text{TaSe}_2$  and the Faraday constant, respectively. The specific capacity of bulk/2D  $\text{TaSe}_2$  is considered 800 and 320  $\text{mAh g}^{-1}$  for 2D and bulk  $\text{TaSe}_2$ , which are obtained at 0.1  $\text{A g}^{-1}$ .

### Calculation of capacity distribution

The contributions of diffusion-controlled insertion process and the surface-controlled pseudocapacitive behaviour can be evaluated by the power-law relationship given by Eq. S4.

$$i = av^b \quad (S4)$$

where  $i$  is the peak current,  $v$  is the scan rate, and a/b are the adjustable parameters. The b values can be obtained from the slope of the  $\log(i) - \log(v)$  plots.  $b=0.5$  implies that the current is limited by the diffusion-controlled insertion process, and  $b=1$  is

equivalent to the surface-controlled perfect pseudocapacitive behaviour.

To quantify the individual contribution of diffusion-controlled and pseudocapacitive behaviours to the total Li<sup>+</sup> storage, the Eq. S5 is used.

$$i(v) = k_1v + k_2v^{1/2} \quad (\text{S5})$$

where  $i(v)$ ,  $k_1v$  and  $k_2v^{1/2}$  represent the total current, surface-controlled current and diffusion-controlled current, respectively. The constants,  $K_1$  and  $K_2$ , are determined by the  $(i/v^{1/2}) - v^{1/2}$  curve.

#### Calculation of Li<sup>+</sup> diffusion coefficient by GITT curve

$$D = \frac{4}{\pi\tau} \left( \frac{m_B V_M}{M_B S} \right)^2 \left( \frac{E_s}{E_t} \right)^2 \quad (\text{S6})$$

Where the  $D$  is diffusion coefficient; the  $m_B$  and  $M_B$  are the active mass and molar mass of the electrodes, respectively; the  $V_M$  is the molar volume; and the  $S$  is the active surface area of the electrodes.

#### Calculation of adsorption energy:

The adsorption energy ( $E_{ad}$ ) is calculated by Eq. S7.

$$E_{ad} = E_{bulk+Li} - E_{bulk} - E_{Li} \quad (\text{S7})$$

where  $E_{bulk+Li}$ ,  $E_{bulk}$  and  $E_{Li}$  are the energy of a Li<sup>+</sup> in hosts, hosts and a Li<sup>+</sup>.

#### Calculation of open circuit voltage

The ion insertion potential is calculated using the following open circuit voltage (OCV) equation. [3]

$$OCV = - \frac{E_{Li x_2 TaSe_2} - E_{Li x_1 TaSe_2} - (x_2 - x_1) E_{Li}}{x_2 - x_1} \quad (\text{S8})$$

where  $E_{\text{Li}x_2\text{TaSe}_2}$  is the total energy of the 2D/bulk TaSe<sub>2</sub> adsorbing Li atoms,  $x_2$  and  $x_1$  are the two adjacent concentrations of absorbed Li<sup>+</sup> on the 2D/bulk TaSe<sub>2</sub>, and  $E_{\text{Li}}$  represents the energy per Li atom in the bcc lattice.

**Calculation of specific capacity retention (SCT) value:**

Based on Figure 3(a), the SCT values are calculated by Eq. S9.

$$SCT = \frac{C_x}{C_{0.2}} \times 100\% \quad (\text{S9})$$

where,  $C_{0.2}$  and  $C_x$  represent the average specific capacities at current densities of 0.2 and  $x$  A/g, respectively.

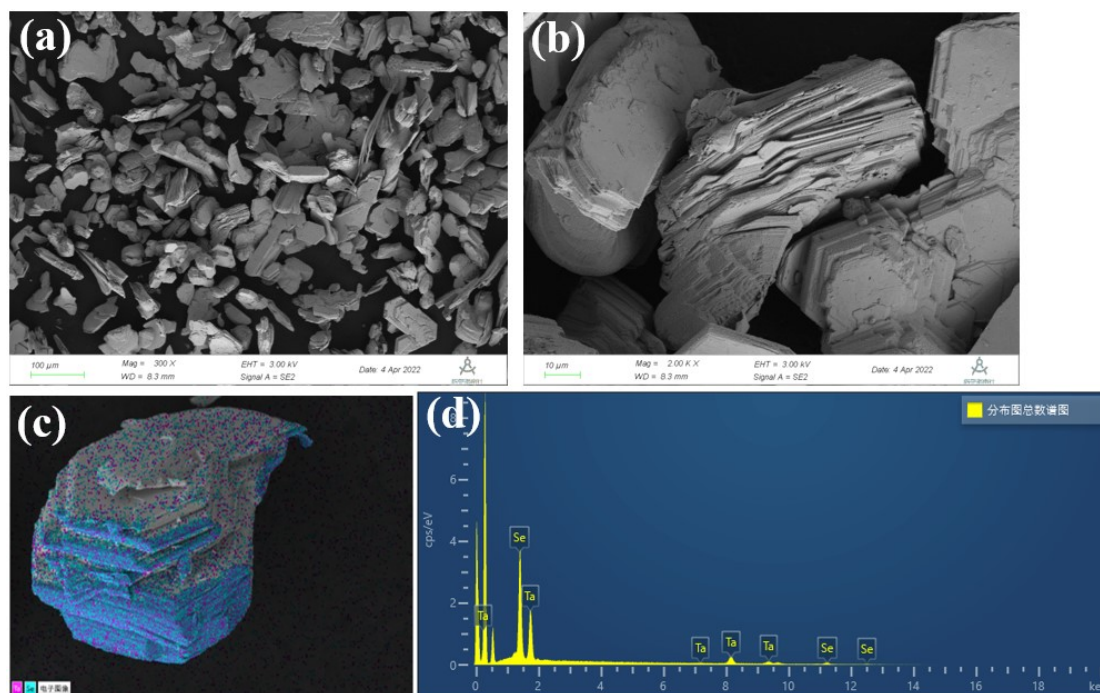

**Figure S1.** (a)-(b) SEM morphology of bulk TaSe<sub>2</sub>. (c)-(d) EDS tests of bulk TaSe<sub>2</sub>.

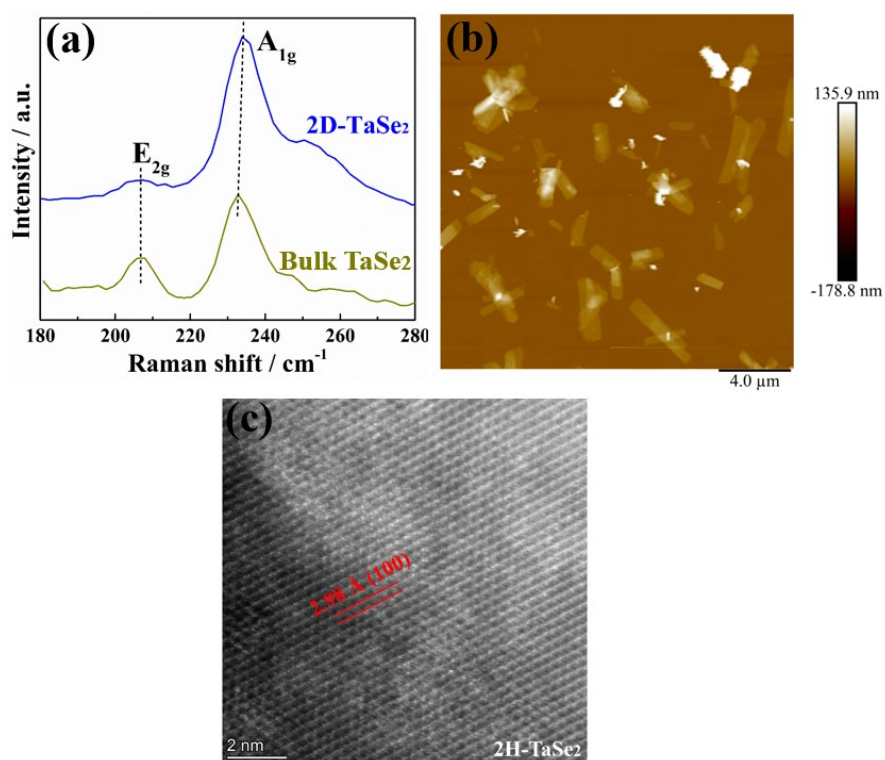

**Figure S2.** (a) Raman spectra of 2D TaSe<sub>2</sub> and bulk TaSe<sub>2</sub>. (b) AFM image with a large number of 2D TaSe<sub>2</sub>. (c) HR-TEM morphology of bulk TaSe<sub>2</sub>.

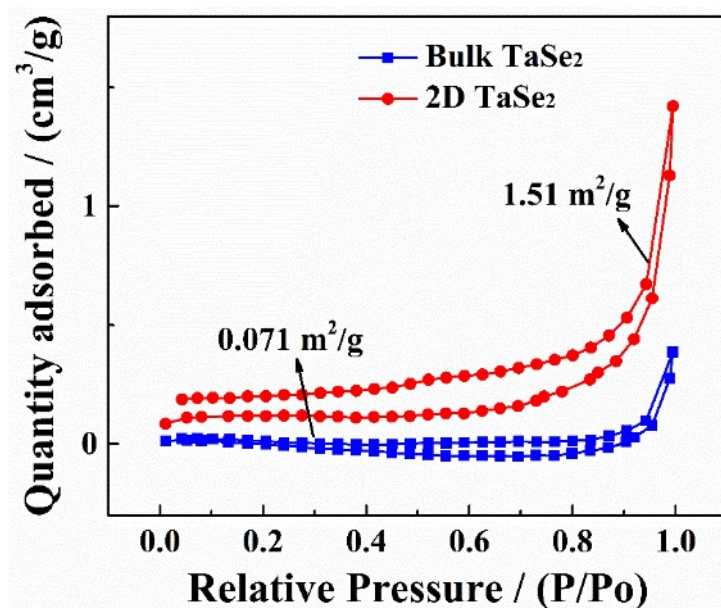

Figure S3.  $N_2$  adsorption/desorption isotherms of bulk  $TaSe_2$  and 2D  $TaSe_2$ .

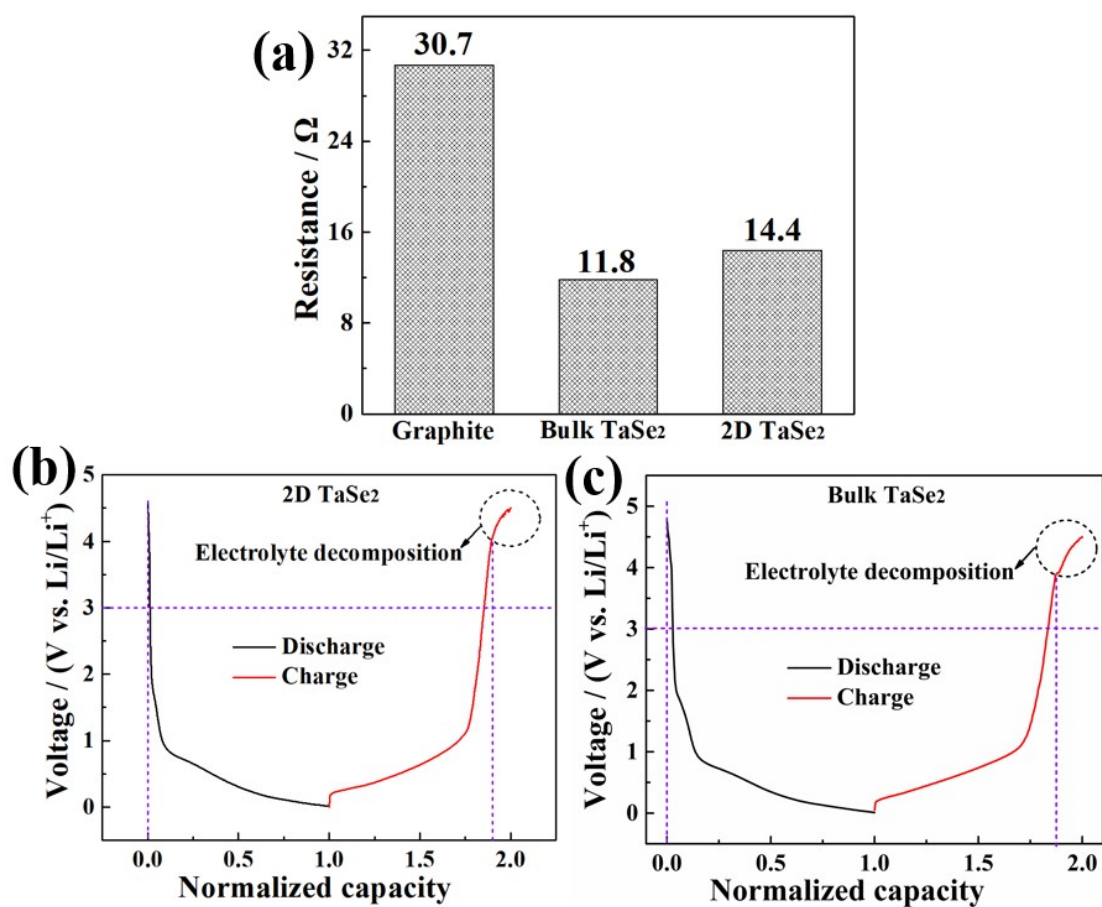

Figure S4. (a) Resistances of 2D  $TaSe_2$ , bulk  $TaSe_2$  and graphite electrodes. Discharge-charge curves of (b) 2D and (c) bulk  $TaSe_2$  between 0.01-4.5 V.



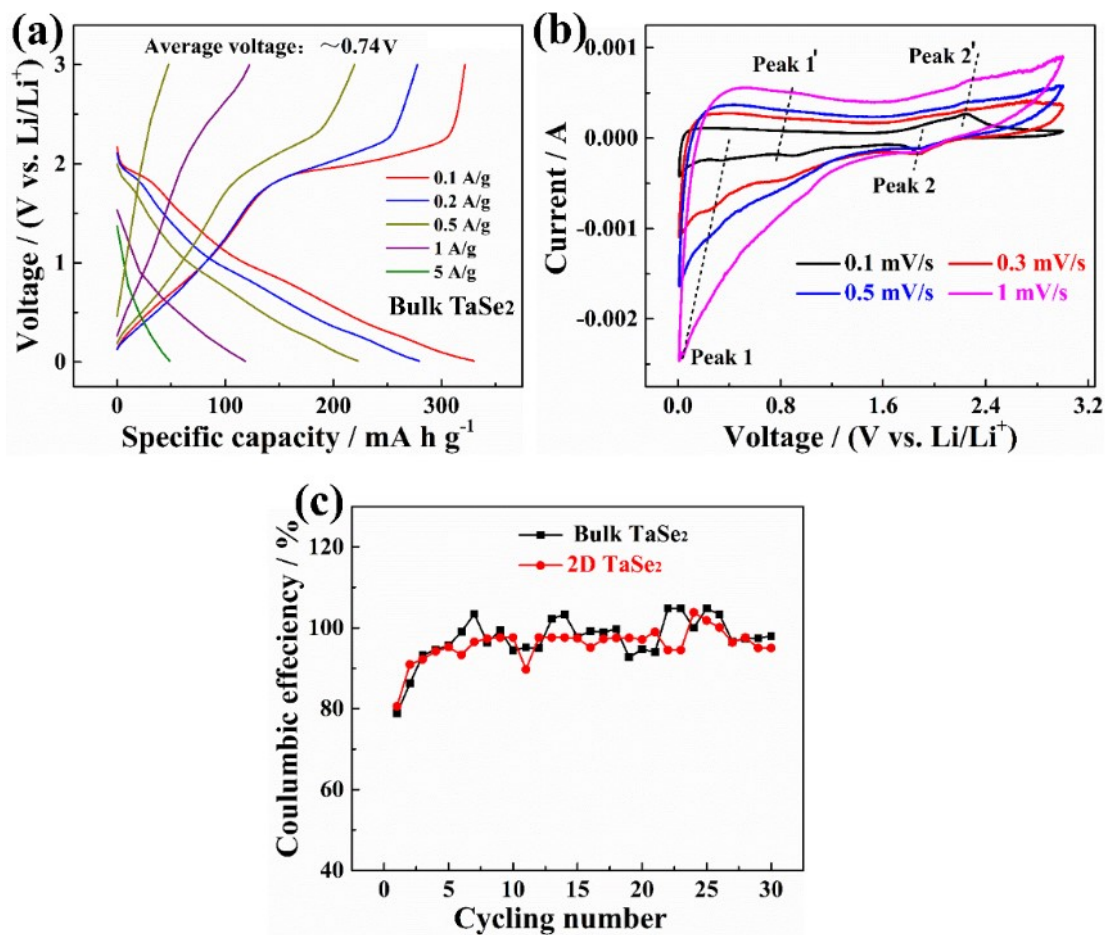

**Figure S5.** (a) Discharge-charge curves of bulk TaSe<sub>2</sub>. (b) CV curves of bulk TaSe<sub>2</sub> with various scanning rates. (c) Coulombic efficiency of bulk and 2D TaSe<sub>2</sub> in rate-performance tests.

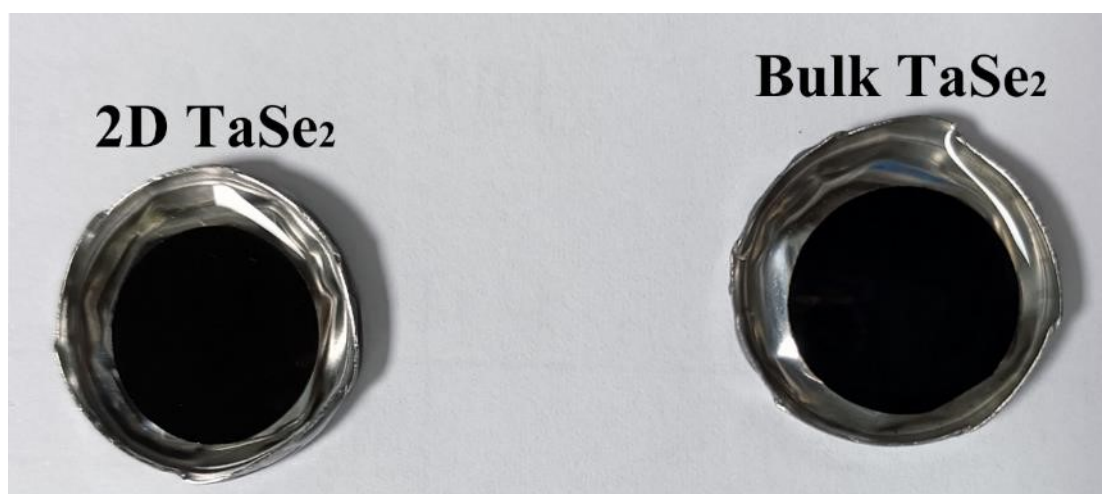

**Figure S6.** Morphology of 2D/bulk TaSe<sub>2</sub> anodes after cycling.

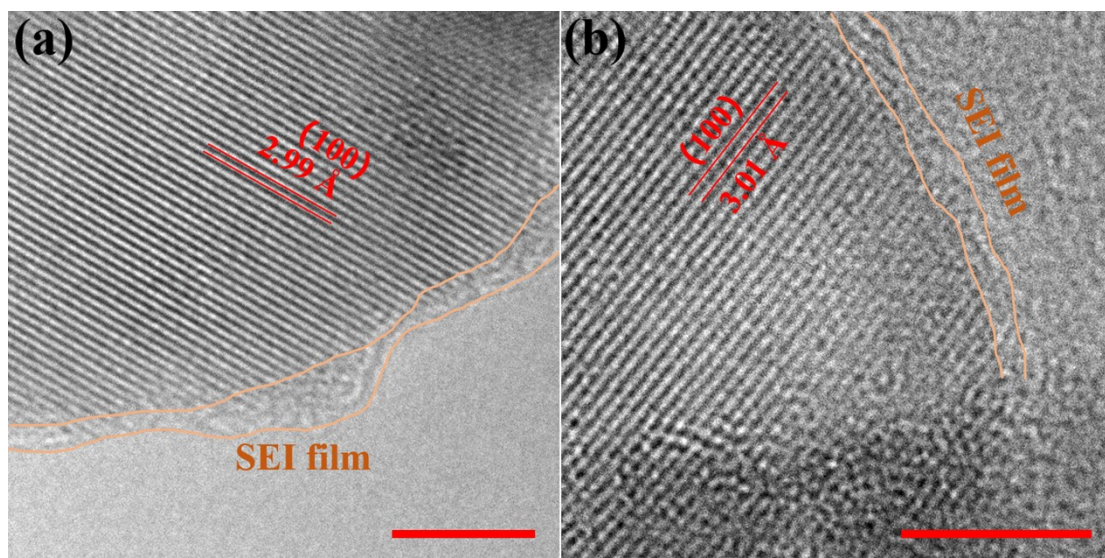

**Figure S7.** After 2000 cycles, the TEM morphology of (a) 2D TaSe<sub>2</sub> and (b) bulk TaSe<sub>2</sub> at 0.01 V (the scale bar: 5 nm).

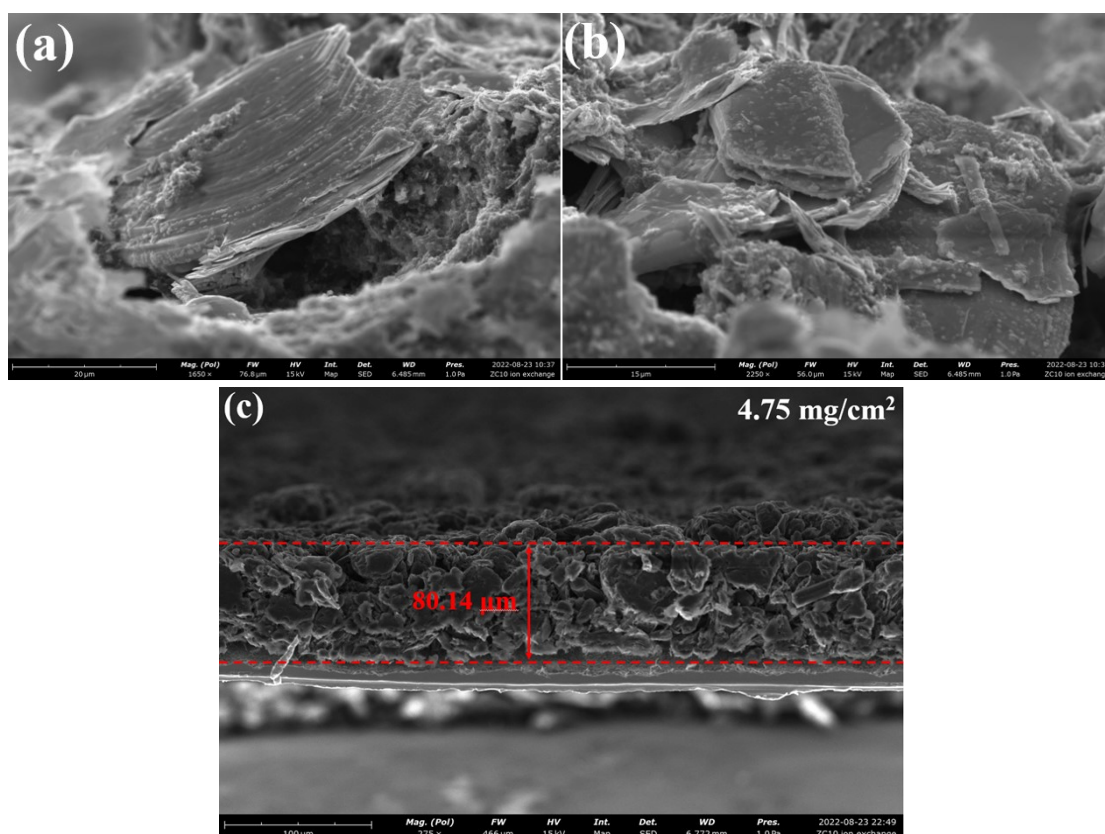

**Figure S8.** Morphology of (a) bulk and (b) 2D TaSe<sub>2</sub> materials after 2000 cycles. (c) Cross-section morphology of graphite electrode with loading mass of 4.75 mg cm<sup>-2</sup>.

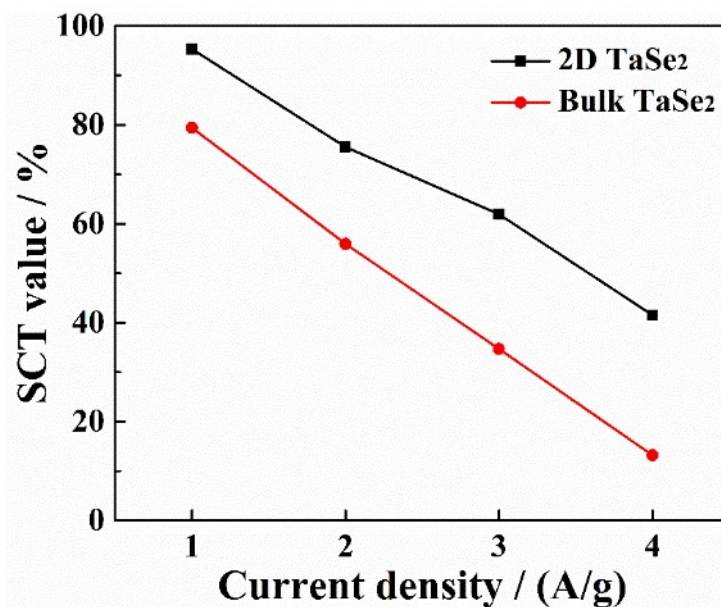

Figure S9. specific capacity retention (SCT) of the two electrodes.

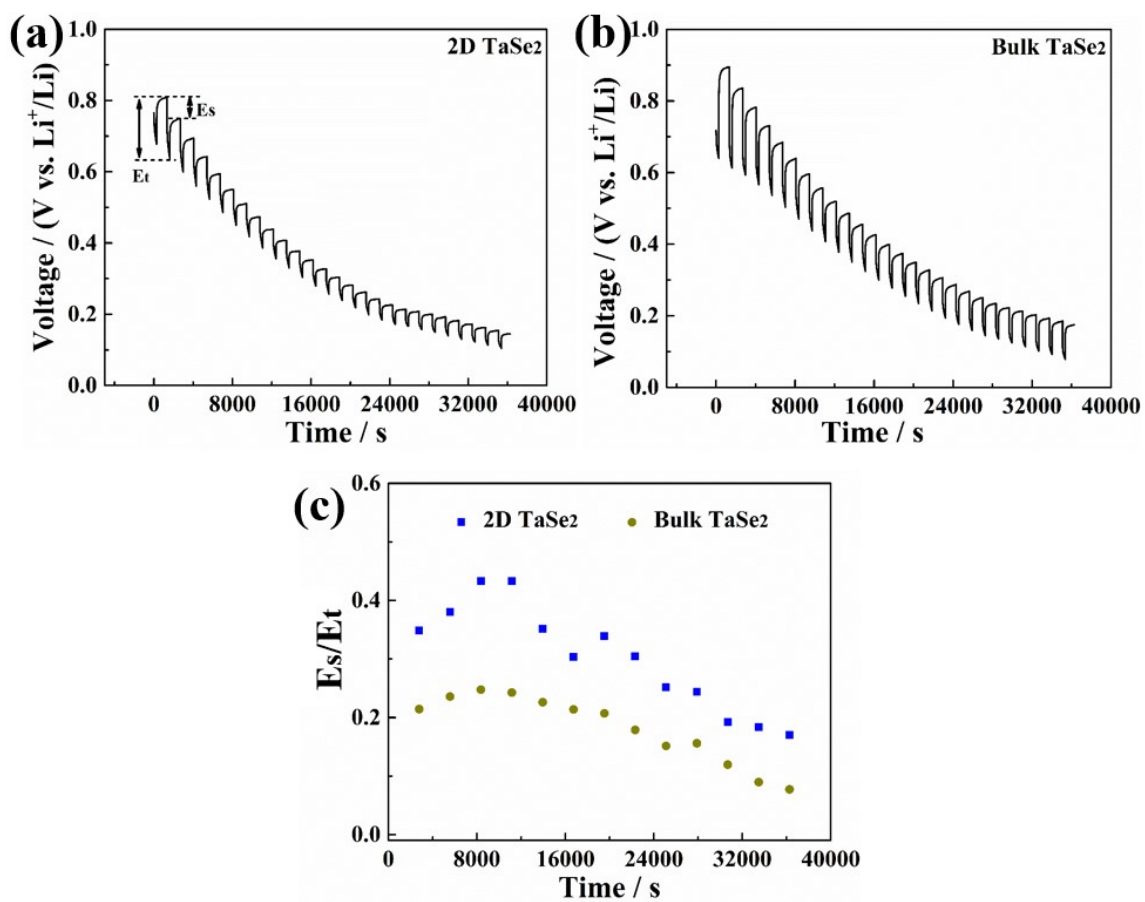

Figure S10. GITT curves of (a) 2D TaSe<sub>2</sub> and (b) bulk TaSe<sub>2</sub>. (c) E<sub>s</sub>/E<sub>t</sub> values of the two electrodes.

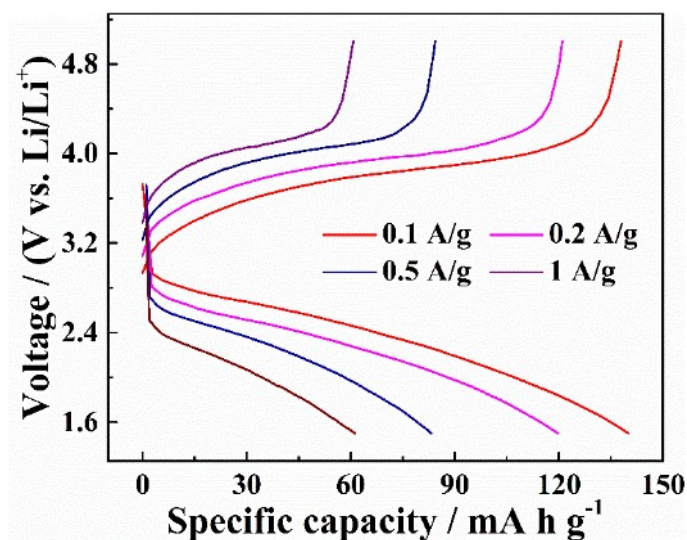

Figure S11. Discharge-charge curves of LiFePO<sub>4</sub>||2D TaSe<sub>2</sub> full cell.

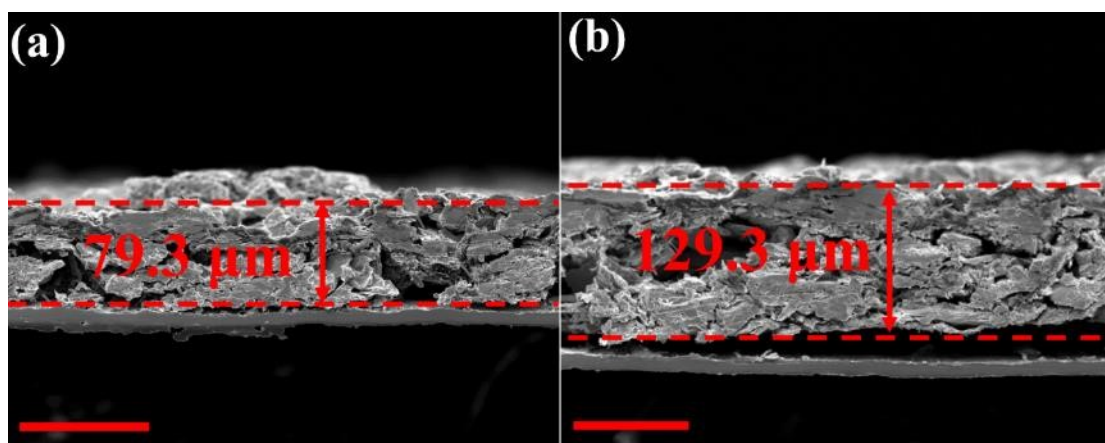

Figure S12. Electrodes thickness of ultrathick (a) bulk TaSe<sub>2</sub> and (b) 2D TaSe<sub>2</sub> electrodes (the scale bar is 100 μm) at full lithiation.

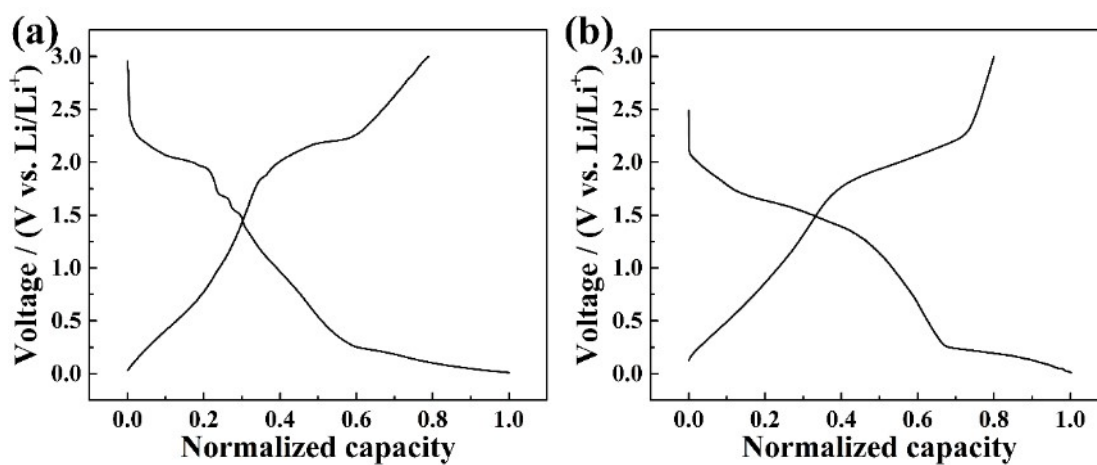

Figure S13. Discharge-charge curves of (a) 2D TaSe<sub>2</sub> and (b) bulk TaSe<sub>2</sub> anodes during in-situ XRD tests.

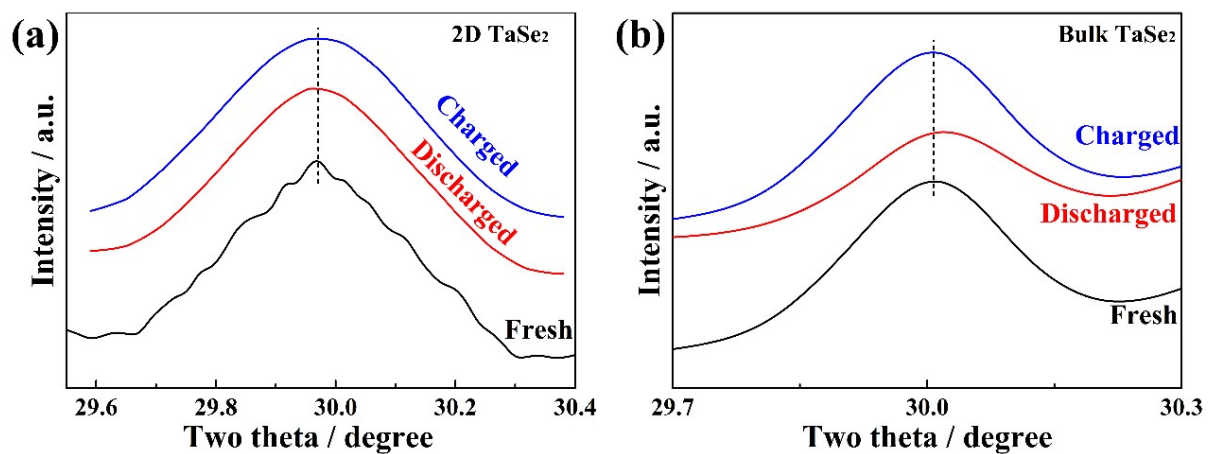

**Figure S14.** Enlarged in-situ XRD peaks of (a) 2D TaSe<sub>2</sub> and (b) bulk TaSe<sub>2</sub> for (100) plane.

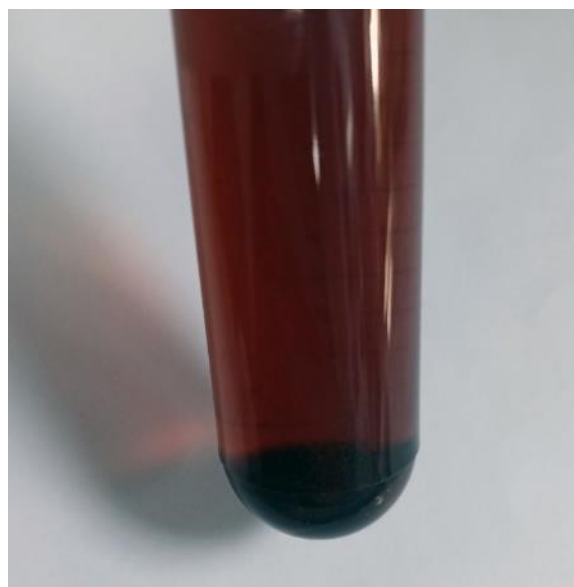

**Figure S15.** Photograph of electrodes at full lithiation immersed in alcohol. Before immersing the electrode in alcohol, the electrode was washed with N-methyl pyrrolidone several times to remove the electrolyte.

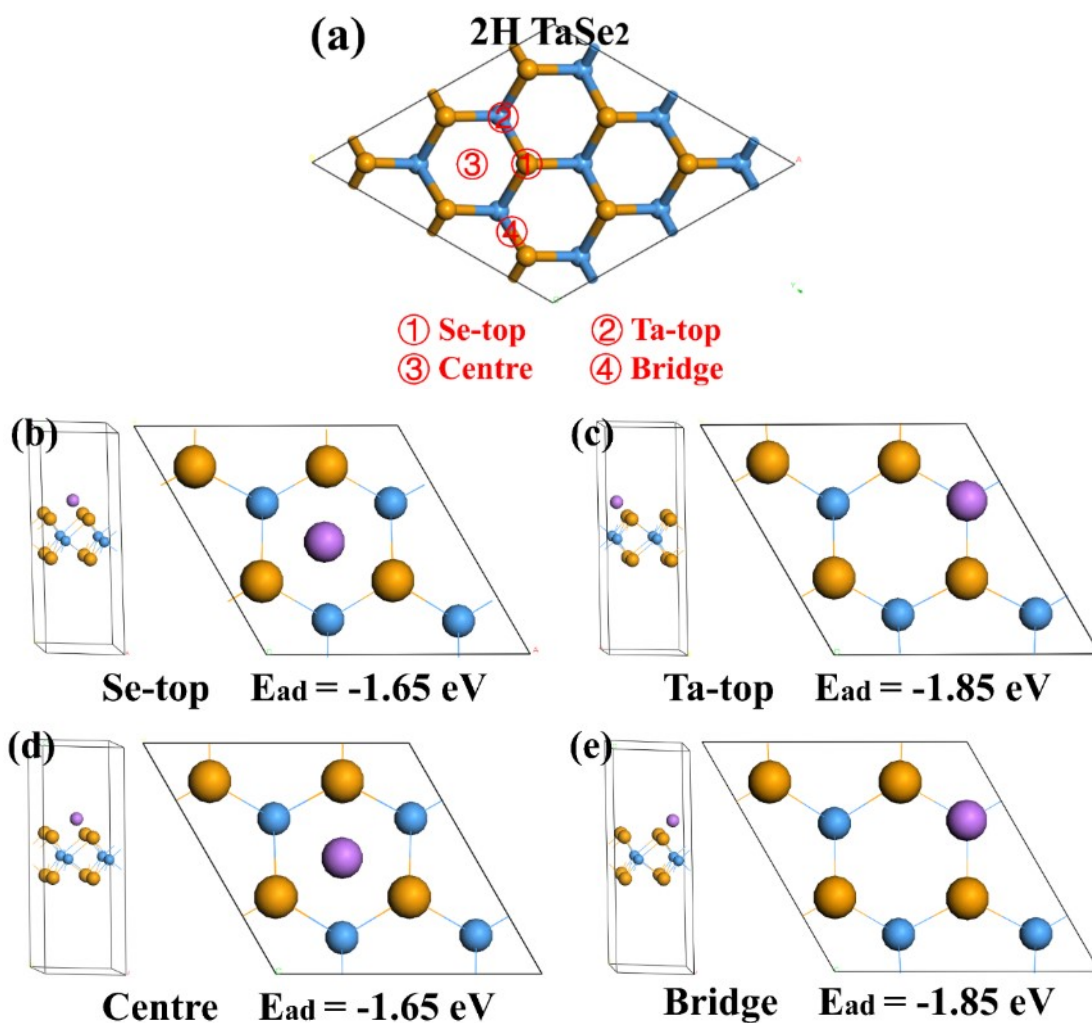

**Figure S16.** (a) Li<sup>+</sup> initial adsorbed sites on single layer 2H phase TaSe<sub>2</sub>. Li<sup>+</sup> adsorption on single layer 2H phase TaSe<sub>2</sub> at initial (b) Se top, (c) Ta top, (d) centre and (e) bridge positions after structural optimization. The purple balls are Li atoms.

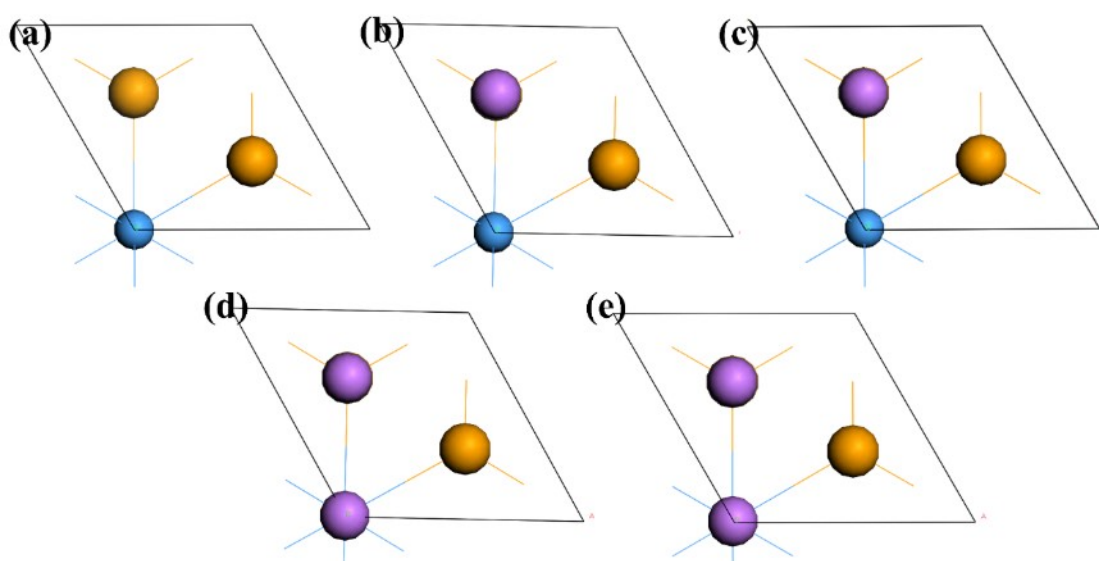

**Figure S17.** Top view of bulk Li<sub>x</sub>TaSe<sub>2</sub> ((a) x=0, (b) x=1, (c) x=2 and (d) x=3 and (e) x=4).

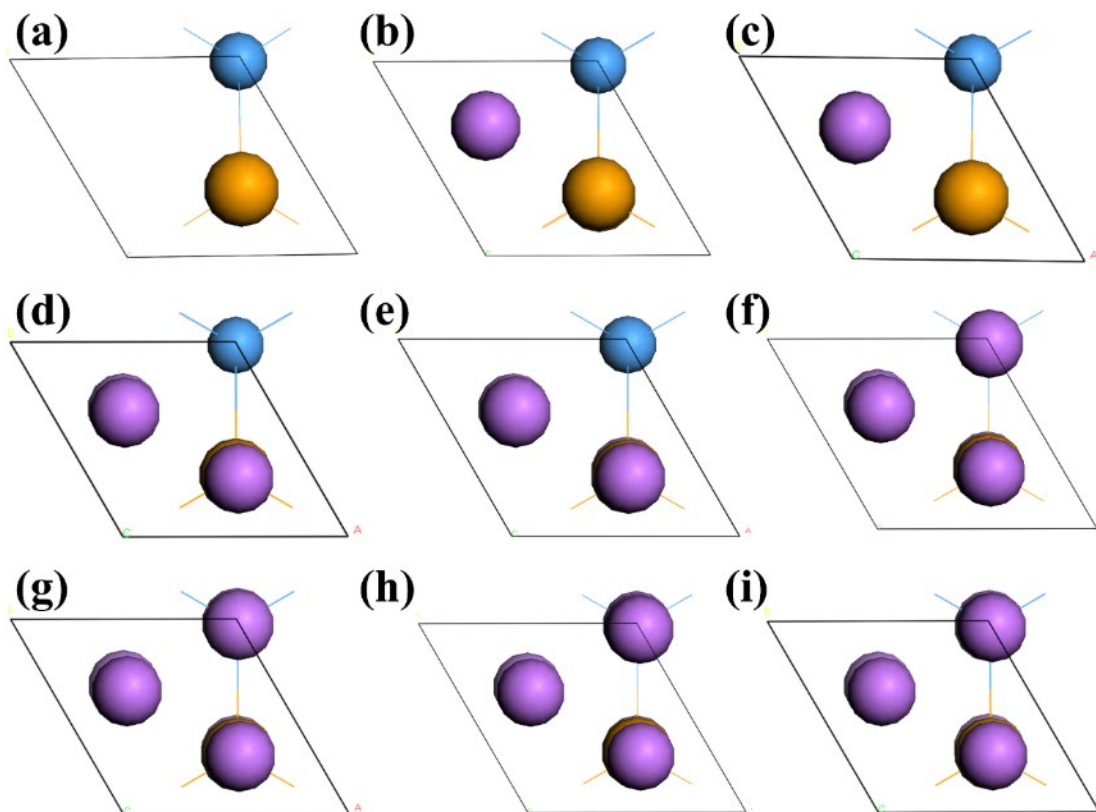

**Figure S18.** Top view of 2D  $\text{Li}_x\text{TaSe}_2$  ((a)  $x=0$ , (b)  $x=1$ , (c)  $x=2$  and (d)  $x=3$  and (e)  $x=4$ , (f)  $x=5$ , (g)  $x=6$ , (h)  $x=7$  and (i)  $x=8$ ).

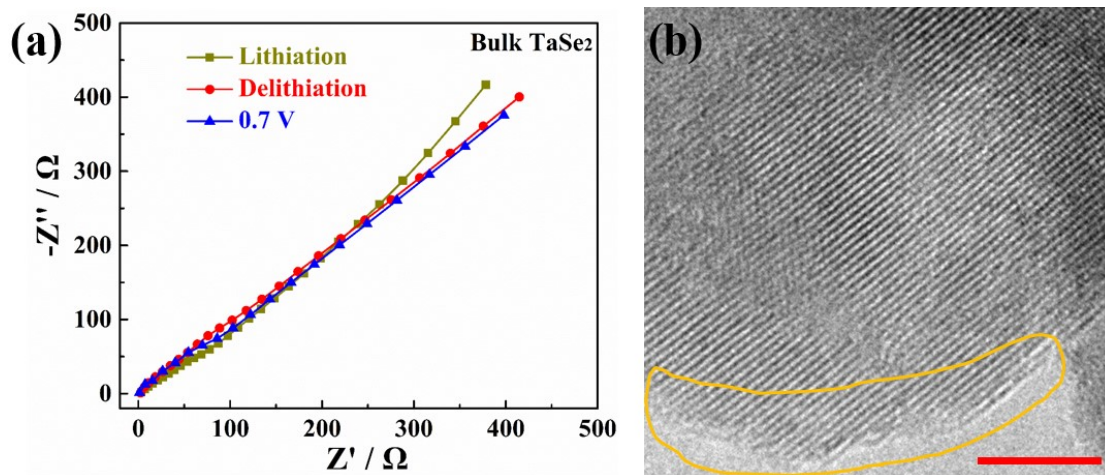

**Figure S19.** (a) EIS plots of bulk  $\text{TaSe}_2$  at various states. (b) TEM morphology of 2D  $\text{TaSe}_2$  at 3 V (the scale bar: 5 nm).

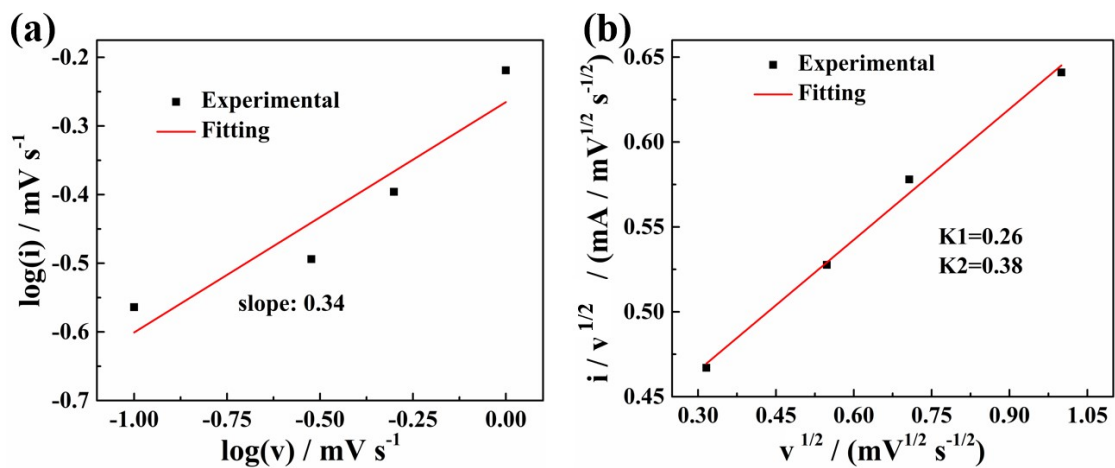

Figure S20. (a)  $\log(i)$  vs.  $\log(v)$  curve and (b)  $(i/v^{1/2})$  vs.  $v^{1/2}$  curve for bulk TaSe<sub>2</sub>.

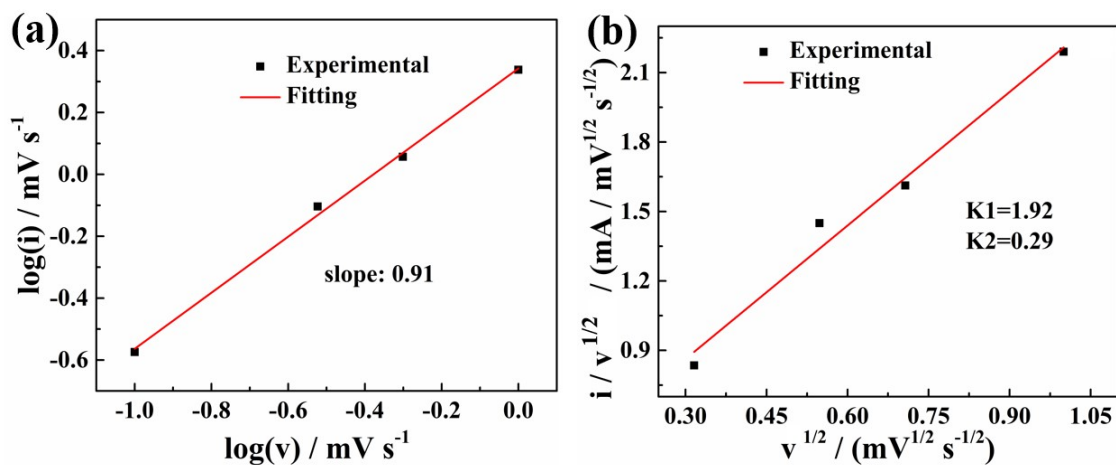

Figure S21. (a)  $\log(i)$  vs.  $\log(v)$  curve and (b)  $(i/v^{1/2})$  vs.  $v^{1/2}$  curve for 2D TaSe<sub>2</sub>.



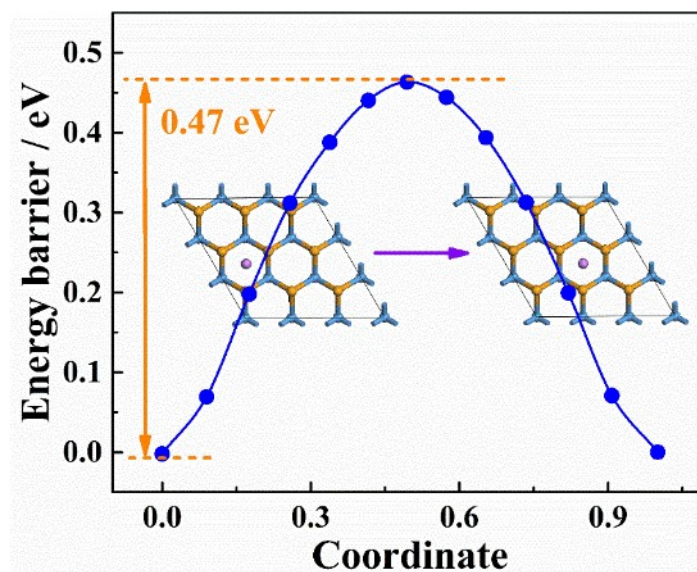

Figure S22. DFT calculations of  $\text{Li}^+$  diffusion energy from centre to centre site.

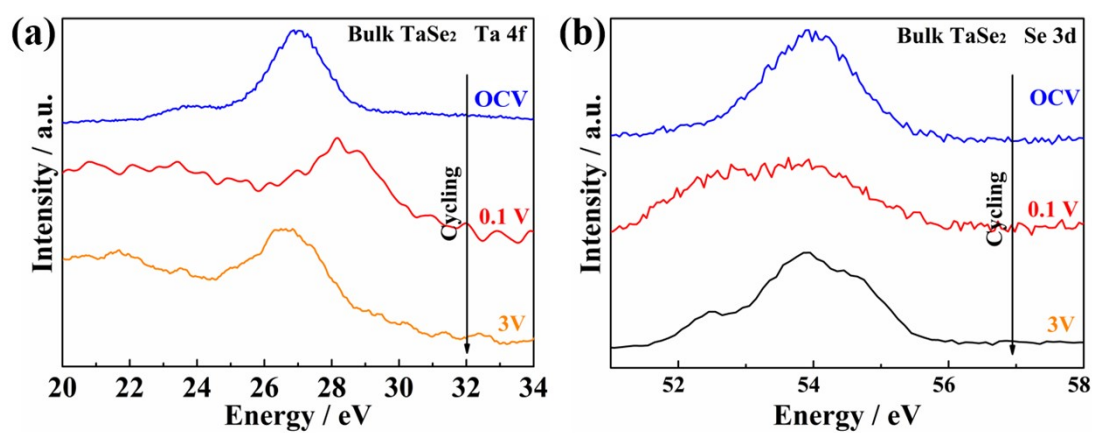

Figure S23. Ex-situ XPS (a) Ta 4f and (b) Se 3d spectra of 2D  $\text{TaSe}_2$  anode during first cycle (0.1 and 3 V) and second cycle (3 V).

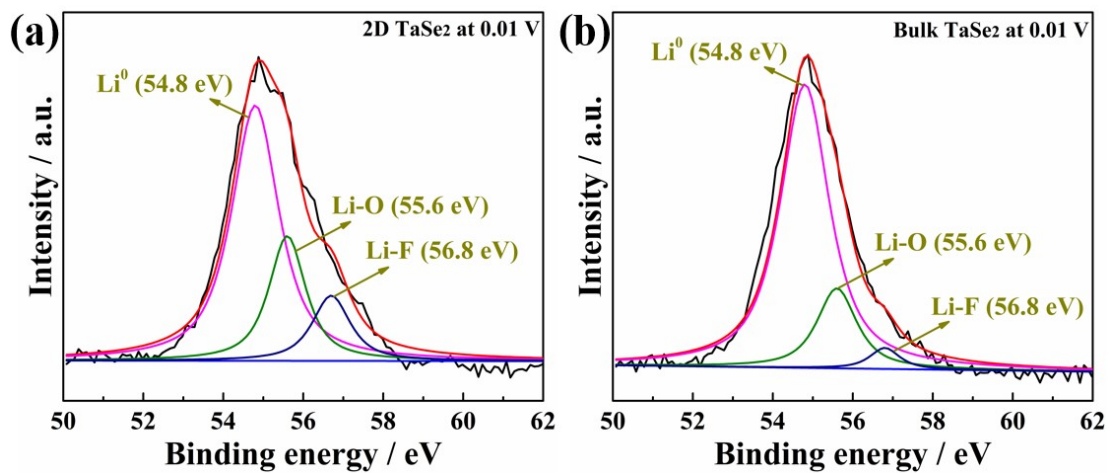

Figure S24. Ex-situ XPS Li 1s spectra of (a) 2D and (b) bulk TaSe<sub>2</sub> anode at 0.01 V.

**Table S1.** Young's modulus of TaSe<sub>2</sub> along various directions.

| Direction | Young's modulus / GPa |
|-----------|-----------------------|
| a-axis    | 140.54                |
| b-axis    | 140.54                |
| c-axis    | 13.56                 |

**Table S2.** Energy of a Li<sup>+</sup> on single layer 2H phase TaSe<sub>2</sub> with different configurations.

| Configurations               | Energy / eV |
|------------------------------|-------------|
| Se-top                       | -61346.2044 |
| Ta-top                       | -61346.2822 |
| Centre                       | -61346.2046 |
| Bridge                       | -61346.2812 |
| Slab without Li <sup>+</sup> | -61142.1083 |

**Table S3.** Li/Ta mole ratio in Li<sub>x</sub>TaSe<sub>2</sub> samples tests by the ICP-OES.

| Sample                 | Li/Ta (lithiation) | Li/Ta (delithiation) |
|------------------------|--------------------|----------------------|
| Bulk TaSe <sub>2</sub> | 4.14               | 0.067                |
| 2D TaSe <sub>2</sub>   | 10.58              | 0.19                 |

**Table S4.** Energy of bulk Li<sub>x</sub>TaSe<sub>2</sub>.

| Number of Li <sup>+</sup> | Energy / eV |
|---------------------------|-------------|
| 0                         | -30571.5847 |
| 1                         | -30979.9961 |
| 2                         | -31385.7796 |
| 3                         | -31791.041  |
| 4                         | -32196.0252 |

**Table S5.** Energy of 2D  $\text{Li}_x\text{TaSe}_2$ .

| Number of $\text{Li}^+$ | Energy / eV |
|-------------------------|-------------|
| 0                       | -15285.5181 |
| 1                       | -15489.8775 |
| 2                       | -15693.5445 |
| 3                       | -15896.8010 |
| 4                       | -16099.8376 |
| 5                       | -16302.6654 |
| 6                       | -16505.3248 |
| 7                       | -16707.8567 |
| 8                       | -16910.2312 |

**Table S6.**  $\text{Li}^+$  diffusion energy in reported anode materials.

| Anode materials                       | Energy barrier / eV | Ref.      |
|---------------------------------------|---------------------|-----------|
| Spinel $\text{LiTi}_2\text{O}_4$      | ~0.55 eV            | [4]       |
| $\text{SrVO}_3$                       | ~0.80 eV            | [5]       |
| Lithium yttrium titanate              | ~0.23 eV            | [6]       |
| High-entropy transition- metal oxide  | ~0.83 eV            | [7]       |
| $\text{Li}_{3+x}\text{V}_2\text{O}_5$ | ~0.40 eV            | [8]       |
| $\text{MgB}_2$                        | ~0.61 eV            | [9]       |
| $\text{BeB}_2$                        | ~0.47 eV            | [9]       |
| 2D-boron sheets                       | ~0.62 eV            | [10]      |
| 2D black arsenic                      | ~0.18 eV            | [11]      |
| Graphdiyne                            | ~0.30 eV            | [12]      |
| 2D $\text{TaSe}_2$                    | ~0.29 eV            | This work |
| 2D $\text{TaSe}_2$                    | ~0.12 eV            | This work |

## References

- [1] Gao X, Zhang G, Luo L, et al. The effects of Ti and Cr on binding and diffusion of Al in V alloys: A first-principles study[J]. *Computational Materials Science*, 2018, 154: 8-13.
- [2] Li Z, Liu B, Wang J, et al. Mechanism of intrinsic point defects and oxygen diffusion in yttrium aluminum garnet: first-principles investigation[J]. *Journal of the American Ceramic Society*, 2012, 95(11): 3628-3633.
- [3] Zhang J, Zhang Y F, Li Y, et al. Blue-AsP monolayer as a promising anode material for lithium- and sodium-ion batteries: a DFT study[J]. *Physical Chemistry Chemical Physics*, 2021, 23, 5143.
- [4] Wang Q, Yu H T, Xie Y, et al. Structural stabilities, surface morphologies and electronic properties of spinel  $\text{LiTi}_2\text{O}_4$  as anode materials for lithium-ion battery: A first-principles investigation[J]. *Journal of Power Sources*, 2016, 319: 185-194.
- [5] Li X, Lin Z, Jin N, et al. Perovskite-Type  $\text{SrVO}_3$  as High-Performance Anode Materials for Lithium-Ion Batteries[J]. *Advanced Materials*, 2021: 2107262.
- [6] Zhang Y, Huang J, Saito N, et al. Layered Perovskite Lithium Yttrium Titanate as a Low-Potential and Ultrahigh-Rate Anode for Lithium-Ion Batteries[J]. *Advanced Energy Materials*, 2022: 2200922.
- [7] Yang X, Wang H, Song Y, et al. Low-Temperature Synthesis of a Porous High-Entropy Transition-Metal Oxide as an Anode for High-Performance Lithium-Ion Batteries[J]. *ACS Applied Materials & Interfaces*, 2022, 14(23): 26873-26881.
- [8] Liu H, Zhu Z, Yan Q, et al. A disordered rock salt anode for fast-charging lithium-ion batteries[J]. *Nature*, 2020, 585(7823): 63-67.
- [9] Wan M, Zhao S, Zhang Z, et al. Two-Dimensional  $\text{BeB}_2$  and  $\text{MgB}_2$  as High Capacity Dirac Anodes for Li-Ion Batteries: A DFT Study[J]. *The Journal of Physical Chemistry C*, 2022, 126, 9642-9651.
- [10] Banerjee S, Periyasamy G, Pati S K. Possible application of 2D-boron sheets as anode material in lithium ion battery: A DFT and AIMD study[J]. *Journal of Materials Chemistry A*, 2014, 2(11): 3856-3864.
- [11] Akgeç B. Two-dimensional black arsenic for Li-ion battery applications: a DFT study[J]. *Journal of Materials Science*, 2019, 54(13): 9543-9552.
- [12] Sun C, Searles D J. Lithium storage on graphdiyne predicted by DFT calculations[J]. *The Journal of Physical Chemistry C*, 2012, 116(50): 26222-26226.
